# Supplementary material for: Reactive direct air capture of CO 2 to C–C coupled products using multifunctional materials
Source: Royal Society of Chemistry journal article supplement (doi:10.1039/d4gc01244e), 2024-01-01
Supplement: d4gc01244e1.pdf [file d4gc01244e1.pdf]

## Supporting information

### Reactive Direct Air Capture of CO<sub>2</sub> to C-C Coupled Products using Multifunctional Materials

Shazia Sharmin Satter, Johnny Saavedra Lopez, Michael L. Hubbard, Yuan Jiang, Robert A. Dagle, Jotheeswari Kothandaraman\*

*Pacific Northwest National Laboratory, Advanced Energy Systems, 902 Battelle Blvd, Richland, WA 99352, USA; E-mail: jotheeswari.kothandaraman@pnnl.gov*

#### S1. Experimental

##### S1.1 Chemicals

High surface area  $\gamma$ -Al<sub>2</sub>O<sub>3</sub> was supplied by Saint Gobin Norpro. Fe(NO<sub>3</sub>)<sub>3</sub>·9H<sub>2</sub>O, Co(NO<sub>3</sub>)<sub>2</sub>·6H<sub>2</sub>O K<sub>2</sub>CO<sub>3</sub>, and glucose were purchased from Sigma Aldrich. Activated carbon (AC), darco G-60 was received from Fisher Scientific. Fe<sub>2</sub>O<sub>3</sub> was purchased from Thermo Scientific Chemicals.

##### S1.2 Preparation of Sorbents and Sorbent-Catalytic Materials

25 wt% K<sub>2</sub>CO<sub>3</sub>/Al<sub>2</sub>O<sub>3</sub> and K<sub>2</sub>CO<sub>3</sub>/AC were synthesized using wet impregnation method by mixing the Al<sub>2</sub>O<sub>3</sub> or AC to an aqueous solution of K<sub>2</sub>CO<sub>3</sub> followed by stirring at room temperature for 10 h. The samples were dried in an oven at 105 °C followed by calcination at 300 °C for 2 h for K<sub>2</sub>CO<sub>3</sub>/Al<sub>2</sub>O<sub>3</sub>.<sup>1</sup>

The Fe<sub>2</sub>O<sub>3</sub>-K<sub>2</sub>CO<sub>3</sub>/Al<sub>2</sub>O<sub>3</sub> (Fe-KA) was prepared by simple physical mixing in a mortar-pestle, keeping the mole ratio of Fe<sub>2</sub>O<sub>3</sub>: K<sub>2</sub>CO<sub>3</sub> = 1:1.

The Fe/C was synthesized following the hydrothermal synthesis method<sup>2</sup> by mixing Fe(NO<sub>3</sub>)<sub>3</sub>·9H<sub>2</sub>O with glucose in 1:1 mole ratio in deionized water. After stirring for 1 h, the mixture was heated at 150 °C for 24 h in a closed vessel. The resulting solid was filtered and washed with 750 mL H<sub>2</sub>O and 75 mL ethanol followed by drying at 120 °C for 10 h. 25 wt% of K<sub>2</sub>CO<sub>3</sub> was impregnated on Fe/C following the similar method to K<sub>2</sub>CO<sub>3</sub>/Al<sub>2</sub>O<sub>3</sub>, denoted as K<sub>2</sub>CO<sub>3</sub>/Fe/C. Prior to CO<sub>2</sub> capture, the K<sub>2</sub>CO<sub>3</sub>/Fe/C was pretreated under H<sub>2</sub> (60 mL/min) for 10 h at 400 °C to ensure carbide formation.

40 wt% of  $\text{Al}_2\text{O}_3$  and 35 wt% of Fe/C was mixed with 100 mL of water followed by impregnation of 25 wt%  $\text{K}_2\text{CO}_3$  and stirring for 10 h. The samples were dried in an oven at 110 °C to evaporate the water. The samples were denoted as  $\text{K}_2\text{CO}_3/\text{Fe}/\text{C}/\text{Al}_2\text{O}_3$ .

The Fe-Co/ $\text{K}_2\text{CO}_3/\text{Al}_2\text{O}_3$  (Fe-Co/KA) and Fe/ $\text{K}_2\text{CO}_3/\text{Al}_2\text{O}_3$  (Fe/KA) were synthesized by wet impregnation method<sup>3</sup>. The  $\text{Fe}(\text{NO}_3)_3 \cdot 9\text{H}_2\text{O}$  and  $\text{Co}(\text{NO}_3)_2 \cdot 6\text{H}_2\text{O}$  were dissolved in water and 25wt% of  $\text{K}_2\text{CO}_3/\text{Al}_2\text{O}_3$  was added to the solution. The mixture was stirred at 60 °C for 4 h followed by drying at 100 °C overnight. The sample was calcined at 500 °C for 4 h. The calcined sample was placed in a Parr reactor, pressurized with 250 psi of  $\text{CO}_2$  and left for 16 h at room temperature to convert any  $\text{K}_2\text{O}$  formed during the reaction back to  $\text{K}_2\text{CO}_3$ . 12.4 wt% Fe and 2.6 wt% Co was impregnated. The resulting sample is named as Fe-Co/ $\text{K}_2\text{CO}_3/\text{Al}_2\text{O}_3$  (Fe-Co/KA). 12.4 wt% Fe/ $\text{K}_2\text{CO}_3/\text{Al}_2\text{O}_3$  (Fe/KA) was also synthesized in the similar way.

### S1.3 Catalyst Characterization

Powder X-ray diffraction (XRD) patterns were recorded using an X-ray diffractometer, Rigaku Smartlab SE diffractometer  $\text{CuK}\alpha$  radiation (40 kV, 44 mA).  $\text{N}_2$  adsorption-desorption experiments were conducted at -196°C (Quadrasorb automated area and pore size analyzer). Specific surface areas and pore diameters were estimated with the Brunauer-Emmett-Teller (BET) equation and Barrett-Joyner-Halenda (BJH) method, respectively. The samples were heated under vacuum at 120 °C for 4 h to remove any physisorbed water (Masterprep multi-zone flow/vacuum degasser). Temperature program desorption (TPD) (Micromeritics AutoChem II) was carried out under the flow of He (10 mL/min) for both fresh and spent samples from 40 to 500 °C (5 °C/min). FTIR spectra of the samples were collected using a DRIFTS cell and Nicolet is50 FTIR Spectrometer using an MCT detector.

### S1.4 $\text{CO}_2$ Capture and Catalytic Evaluation

The investigation on integrated  $\text{CO}_2$  capture and hydrogenation was performed using the experimental setup shown in Scheme S1. The setup consists of three MFCs connected to a fixed bed flow reactor and an evaporator for introducing water vapor. 2 g of sorbent or sorbent-catalyst (sorb-cat) in powder form was used for each run. The materials were either pretreated at 200 °C for 1 h under  $\text{N}_2$  flow (100 mL/min.) or 400 °C under  $\text{H}_2$  flow at 60 mL/min flow rate for 5 h. Integrated  $\text{CO}_2$  capture and conversion involves two key steps:

1.  $\text{CO}_2$  capture was performed at 25 °C in presence of 0.5 mol%  $\text{H}_2\text{O}$  vapor. The carbonation reaction was carried out by co-feeding 400 ppm of  $\text{CO}_2$  at 1200 mL/min along with 0.5 mol%  $\text{H}_2\text{O}$  vapor at 25 °C over the sorbent or sorb-cat bed for 4 h. The  $\text{CO}_2$  adsorbed was analyzed by  $\text{CO}_2$  analyzer, Model 906 equipped with an NDIR sensor. In a different set of reaction, the target material was first pre-saturated with 0.5 or 1.0 mol% of  $\text{H}_2\text{O}$  vapor for 2 h followed by co-feeding  $\text{CO}_2$  (400 ppm, 1200 mL/min) (in  $\text{N}_2$ ) with  $\text{H}_2\text{O}$  vapor (0.5 mol%) for 4 h.

2. Reduction of the captured  $\text{CO}_2$  was carried out under  $\text{H}_2$  flow of 60 mL/min, 1.0 MPa and at 320 and 360 °C. The product gases were analyzed by four-channel Inficon micro-GC fusion with a TCD detector.

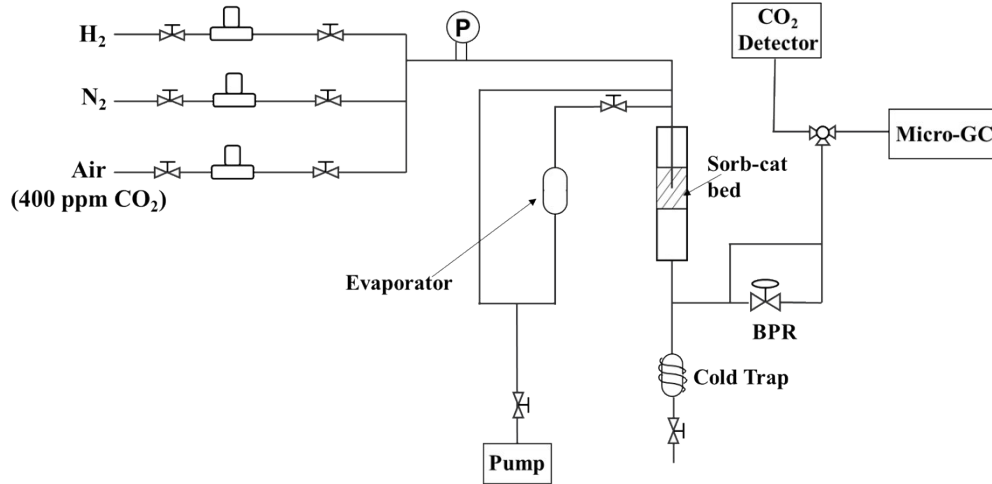

**Scheme S1:** Set-up for direct air capture (DAC)

The calculation of the molar quantity of the CO<sub>2</sub> adsorbed, denoted as  $n_{CO_2}$  per gram of sorbent, was performed by integrating the molar concentration curve (derived from CO<sub>2</sub> ppm vs. time data, as shown in Figure S2) over the CO<sub>2</sub> capture time ( $F_{CO_2}$ , 4h), and then divided by the mass of the sorbent ( $W$ ), as shown in the equation below:

$$n_{CO_2} = \frac{1}{W} \int_{t_0}^{t_A} F_{CO_2}(t) dt \quad (1)$$

DAC and Conversion:

The CO<sub>2</sub> conversion ( $X_{CO_2}$ ) and the selectivity ( $S$ ) of each product ( $x$ ) were calculated using the following equations:

$$X_{CO_2} = \frac{n_{total\ products}}{n_{CO_2\ adsorbed}} \times 100\% \quad (2)$$

$$S_x = \frac{n_x}{n_{total\ products}} \times 100\% \quad (3)$$

where  $n$  is the number of moles of the components identified from the outlet gases.

Gas phase CO<sub>2</sub> Conversion:

The CO<sub>2</sub> conversion ( $X_{CO_2}$ ) and the selectivity ( $S$ ) of each product ( $x$ ) were calculated using the following equations:

$$X_{CO_2} = \frac{n_{total\ products}}{n_{inlet\ CO_2}} \times 100\% \quad (4)$$

$$S_x = \frac{n_x}{n_{total\ products}} \times 100\% \quad (5)$$

## S2. Results

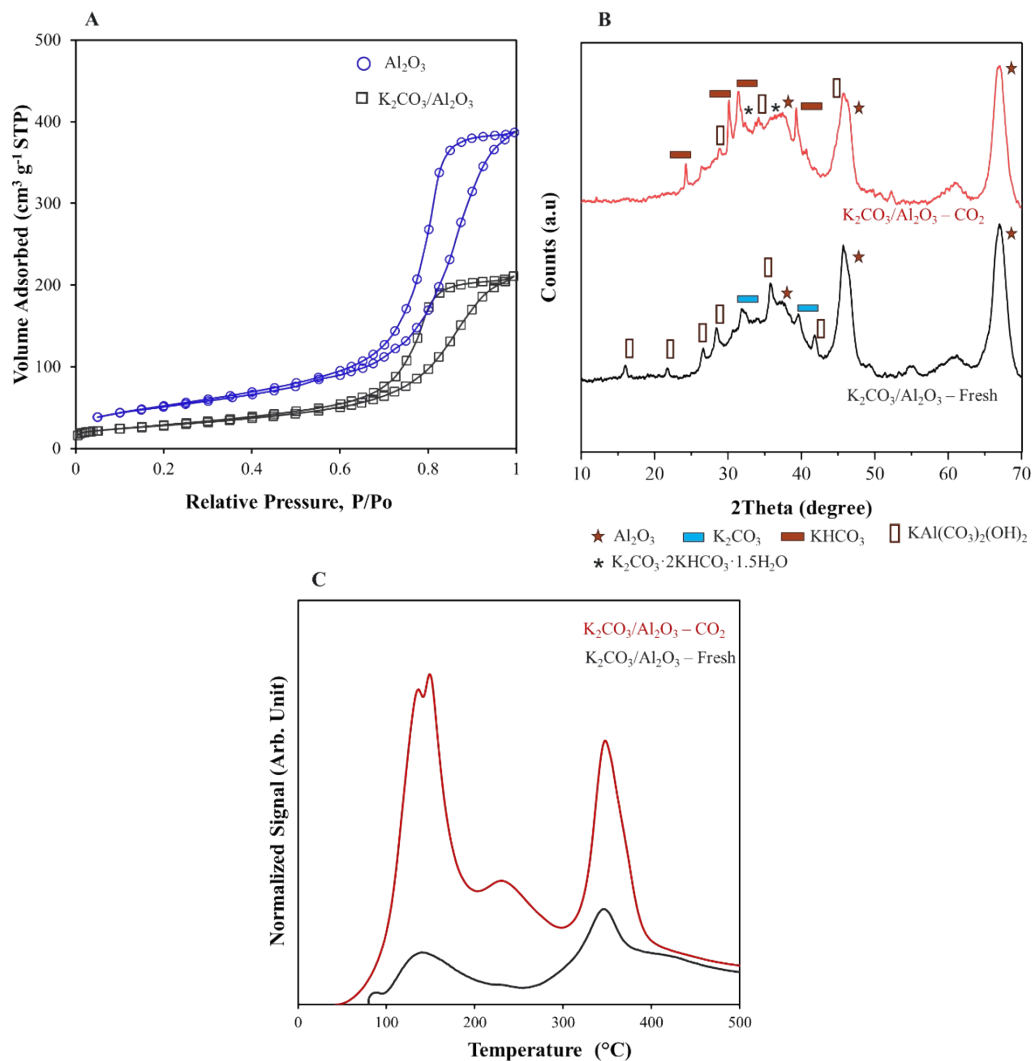

**Figure S1:** (A) Nitrogen adsorption-desorption isotherm of Al<sub>2</sub>O<sub>3</sub> and K<sub>2</sub>CO<sub>3</sub>/Al<sub>2</sub>O<sub>3</sub> (B) Wide angle XRD of fresh and CO<sub>2</sub> captured K<sub>2</sub>CO<sub>3</sub>/Al<sub>2</sub>O<sub>3</sub> (C) TPD of fresh and CO<sub>2</sub> captured K<sub>2</sub>CO<sub>3</sub>/Al<sub>2</sub>O<sub>3</sub>.

XRD of the CO<sub>2</sub> captured sample in Figure S1B shows the characteristic narrow diffraction peaks for KHCO<sub>3</sub> (ICDD PDF-2 #13-5503). The peaks for dawsonite in the CO<sub>2</sub> captured sample is broader compared to the fresh one, which indicates that the introduction of 400 ppm CO<sub>2</sub> through the sample in presence of water vapor gives rise to formation

of more dawsonite. Small, broad peaks were also visible confirming the presence of  $\text{K}_2\text{CO}_3 \cdot 2\text{KHCO}_3 \cdot 1.5\text{H}_2\text{O}$  (ICDD PDF-2 #20-0886).<sup>4,5</sup>

**Table S1:** Physicochemical properties of  $\text{Al}_2\text{O}_3$  and  $\text{K}_2\text{CO}_3/\text{Al}_2\text{O}_3$ .

|                                               | SA ( $\text{m}^2/\text{g}$ ) | PV ( $\text{cm}^3/\text{g}$ ) | Average Diameter (nm) |
|-----------------------------------------------|------------------------------|-------------------------------|-----------------------|
| $\text{Al}_2\text{O}_3$                       | 182.4                        | 0.6001                        | 11.4                  |
| $\text{K}_2\text{CO}_3/\text{Al}_2\text{O}_3$ | 99.19                        | 0.3262                        | 10.09                 |

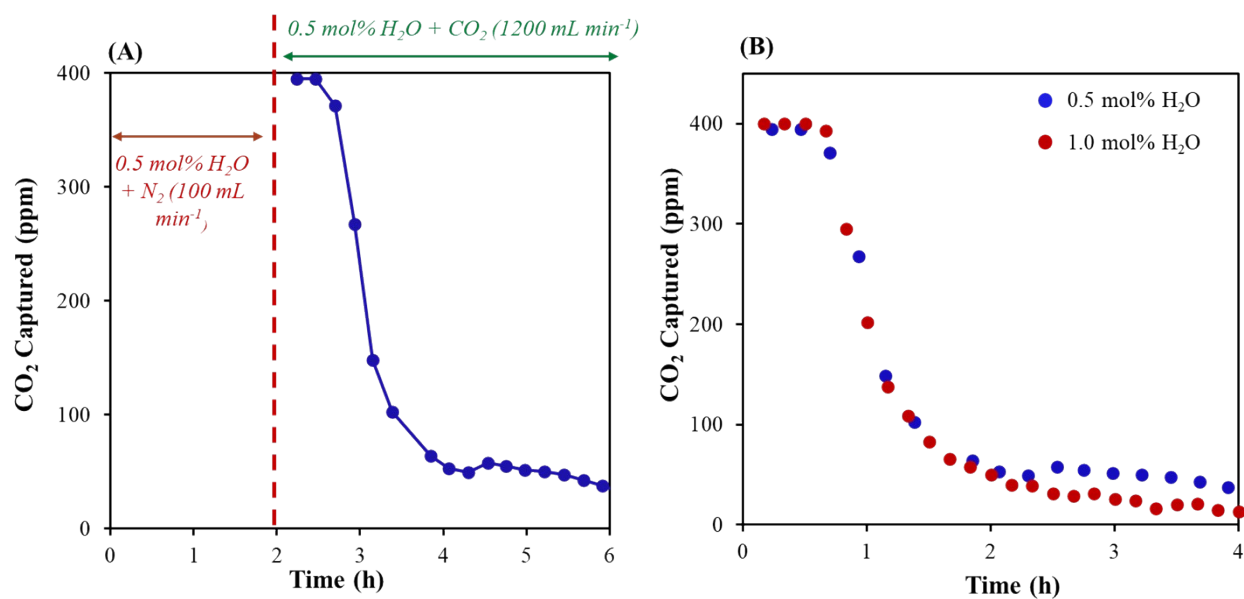

**Figure S2:** (A) CO<sub>2</sub> capture profile for  $\text{K}_2\text{CO}_3/\text{Al}_2\text{O}_3$  pre-saturated with 0.5 mol% H<sub>2</sub>O followed by co-feeding CO<sub>2</sub> with H<sub>2</sub>O vapor, (B) Comparison of CO<sub>2</sub> capture profile for  $\text{K}_2\text{CO}_3/\text{Al}_2\text{O}_3$  pre-saturated with 0.5 and 1.0 mol% of H<sub>2</sub>O vapor.

Amount of material: 2 g; Pretreatment conditions: N<sub>2</sub> = 100 mL/min, 200 °C, 1 h; CO<sub>2</sub> capture conditions: CO<sub>2</sub> = 400 ppm in N<sub>2</sub> (flow rate = 1200 mL/min), H<sub>2</sub>O vapor = 0.5 mol%, 25 °C, 4 h.

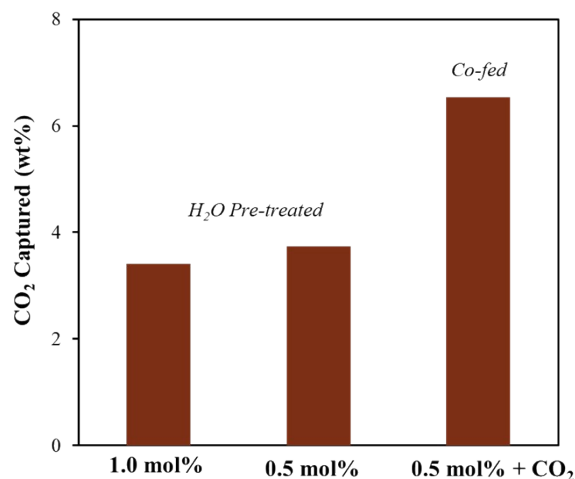

**Figure S3:** Comparison of CO<sub>2</sub> capture capacity in wt% for K<sub>2</sub>CO<sub>3</sub>/Al<sub>2</sub>O<sub>3</sub> under different conditions. Amount of material: 2 g; Pretreatment conditions: N<sub>2</sub> = 100 mL/min, 200 °C, 1 h; CO<sub>2</sub> capture conditions: CO<sub>2</sub> = 400 ppm in N<sub>2</sub> (flow rate = 1200 mL/min), H<sub>2</sub>O vapor = 0.5 mol%, 25 °C, 4 h.

For the H<sub>2</sub>O vapor-pretreated samples, K<sub>2</sub>CO<sub>3</sub>/Al<sub>2</sub>O<sub>3</sub> was first saturated with 0.5 and 1.0 mol% H<sub>2</sub>O vapor for 2 h followed by co-feeding CO<sub>2</sub> (400 ppm in N<sub>2</sub>) with H<sub>2</sub>O vapor (0.5 and 1.0 mol%) for 4 h. For the co-fed experiment, 0.5 mol% H<sub>2</sub>O vapor was co-fed with 400 ppm of CO<sub>2</sub> over K<sub>2</sub>CO<sub>3</sub>/Al<sub>2</sub>O<sub>3</sub> for 6 h.

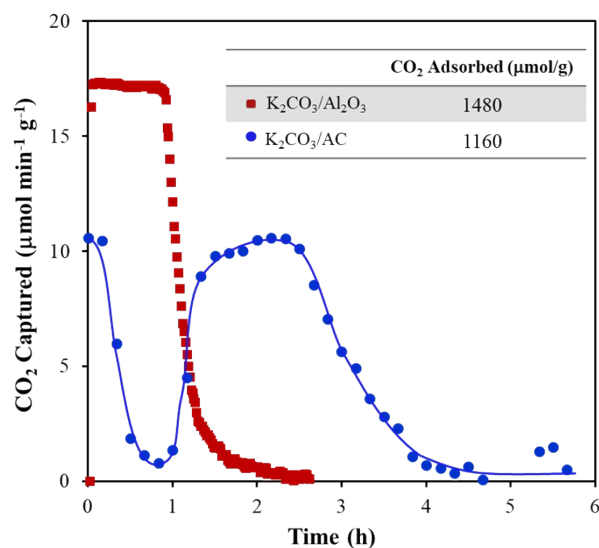

**Figure S4:** CO<sub>2</sub> capture profile in molar flow concentration versus time for K<sub>2</sub>CO<sub>3</sub>/Al<sub>2</sub>O<sub>3</sub> and K<sub>2</sub>CO<sub>3</sub>/AC. Amount of material (K<sub>2</sub>CO<sub>3</sub>/Al<sub>2</sub>O<sub>3</sub> or K<sub>2</sub>CO<sub>3</sub>/AC): 2 g; Pretreatment conditions: N<sub>2</sub> = 100 mL/min, 200 °C, 1 h; CO<sub>2</sub> capture conditions: CO<sub>2</sub> = 400 ppm in N<sub>2</sub> (flow rate = 1200 mL/min), H<sub>2</sub>O vapor = 0.5 mol%, 25 °C, 4 h

**Table S2:** CO<sub>2</sub> Sorption Capacity of the Sorb-Cat materials.

| Materials                                                      | Pretreatment Conditions      | CO <sub>2</sub> Captured (μmol/g) | K <sub>2</sub> CO <sub>3</sub> (μmol/g) | CO <sub>2</sub> Desorbed (μmol/g) |
|----------------------------------------------------------------|------------------------------|-----------------------------------|-----------------------------------------|-----------------------------------|
| K <sub>2</sub> CO <sub>3</sub> /Al <sub>2</sub> O <sub>3</sub> | N <sub>2</sub> , 200 °C, 1 h | 1487                              | 1820                                    | N/A                               |
| K <sub>2</sub> CO <sub>3</sub> /Al <sub>2</sub> O <sub>3</sub> | H <sub>2</sub> , 400 °C, 5h  | 1862                              | 1820                                    | N/A                               |
| Fe <sub>2</sub> O <sub>3</sub> -KA (PM)                        | N <sub>2</sub> , 200 °C, 1 h | 591                               | 1750                                    | 1082                              |
| Fe <sub>2</sub> O <sub>3</sub> -KA (PM)                        | H <sub>2</sub> , 400 °C, 5 h | 1420                              | 1750                                    | 1220                              |

Amount of material: 2 g; CO<sub>2</sub> capture conditions: CO<sub>2</sub> = 400 ppm in N<sub>2</sub> (flow rate = 1200 mL/min), H<sub>2</sub>O vapor = 0.5 mol%, 25 °C, 4 h; Hydrogenation: H<sub>2</sub> = 60 mL/min, 1.0 MPa, 320 °C for 2.5 h (5 °C/min), followed by heating to 360 °C (5 °C/min) for 2 h.

**Table S3:** Comparison of the CO<sub>2</sub> capture capacity of K<sub>2</sub>CO<sub>3</sub>/Al<sub>2</sub>O<sub>3</sub> and Fe/KA for two cycles.

| Entry | Material                                                                                                                 |                         | Pretreatment Condition                                            | CO <sub>2</sub> Capture Capacity (μmol/g) | Capture Capacity (wt%) |
|-------|--------------------------------------------------------------------------------------------------------------------------|-------------------------|-------------------------------------------------------------------|-------------------------------------------|------------------------|
| 1     | Fresh K <sub>2</sub> CO <sub>3</sub> /Al <sub>2</sub> O <sub>3</sub> <sup>a</sup>                                        | Cycle 1                 | N <sub>2</sub> (100 mL/min), 200 °C, 1 h                          | 1487                                      | 6.5                    |
|       | Spent K <sub>2</sub> CO <sub>3</sub> /Al <sub>2</sub> O <sub>3</sub> <sup>a</sup>                                        | Cycle 2                 | N <sub>2</sub> (100 mL/min), 200 °C, 1 h                          | 1203                                      | 5.3                    |
|       | K <sub>2</sub> CO <sub>3</sub> /Al <sub>2</sub> O <sub>3</sub>                                                           | Cycle 1                 | H <sub>2</sub> , 400 °C, 5h                                       | 1862                                      | 8.2                    |
| 2     | Fe/KA <sup>a</sup>                                                                                                       | Cycle 1                 | H <sub>2</sub> (60 mL/min), 400 °C, 5 h                           | 1645                                      | 7.4                    |
|       | Fe/KA (spent) <sup>a</sup>                                                                                               | Cycle 2                 | H <sub>2</sub> (60 mL/min), 320 °C for 2.5 h and 400 °C for 2.5 h | 1276                                      | 5.6                    |
| 3     | K <sub>2</sub> CO <sub>3</sub> /Al <sub>2</sub> O <sub>3</sub> (unmodified Al <sub>2</sub> O <sub>3</sub> )              | Literature <sup>4</sup> | Ar (100 mL/min), 200 °C, 1 h                                      | ~ 826                                     | 3.6                    |
|       | K <sub>2</sub> CO <sub>3</sub> /Al <sub>2</sub> O <sub>3</sub> -750 (Thermally modified Al <sub>2</sub> O <sub>3</sub> ) |                         |                                                                   | ~ 938                                     | 4.1                    |

Amount of material: 2 g; CO<sub>2</sub> capture conditions for entries 1 and 2: CO<sub>2</sub> = 400 ppm in N<sub>2</sub> (flow rate = 1200 mL/min), H<sub>2</sub>O vapor = 0.5 mol%, 25 °C, 4 h.

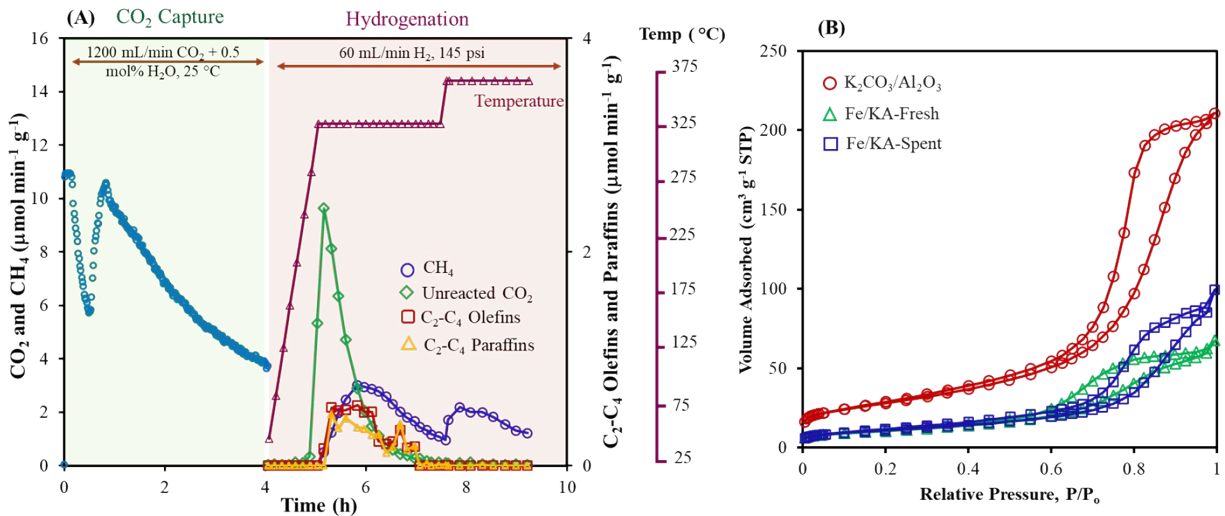

**Figure S5:** (A)  $\text{CO}_2$  capture followed by hydrogenation of captured  $\text{CO}_2$  over Fe/KAlOx, (B)  $\text{N}_2$  adsorption-desorption isotherm of  $\text{K}_2\text{CO}_3/\text{Al}_2\text{O}_3$ , Fe/KAlOx-Fresh and Fe/KAlOx-Spent samples.

Fe/KAlOx: 2 g; Pretreatment conditions:  $\text{H}_2$  = 60 mL/min, 400 °C, 5 h;  $\text{CO}_2$  capture conditions:  $\text{CO}_2$  = 400 ppm in  $\text{N}_2$  (flow rate = 1200 mL/min),  $\text{H}_2\text{O}$  vapor = 0.5 mol%, 25 °C, 4 h; Hydrogenation:  $\text{H}_2$  = 60 mL/min, 1.0 MPa, 320 °C for 2.5 h (5 °C/min), followed by heating to 360 °C (5 °C/min) for 2 h.

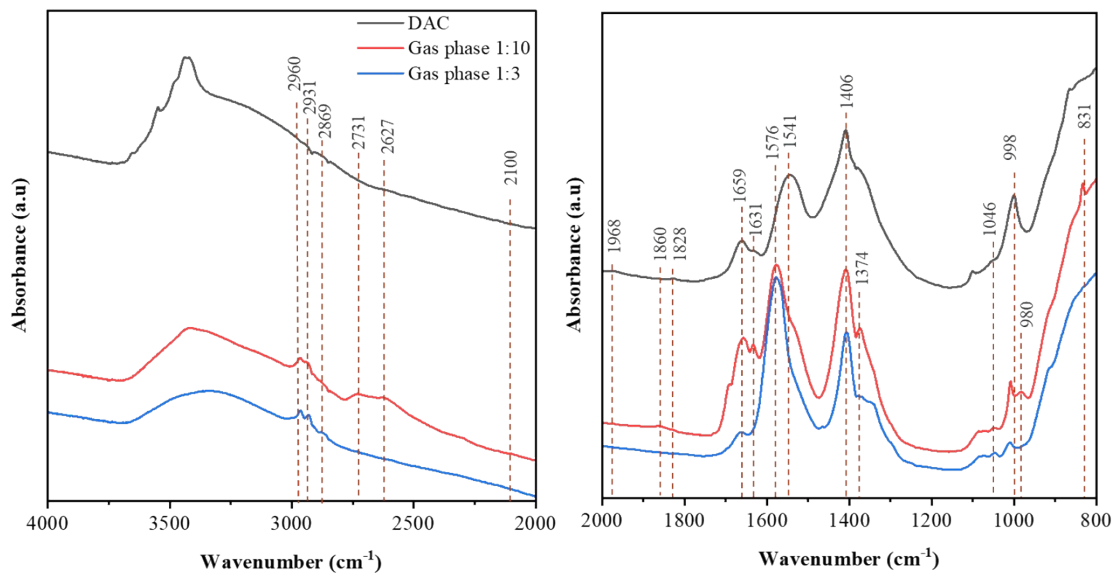

**Figure S6:** FTIR spectrum of spent samples of Fe/KAlOx for DAC and gas phase  $\text{CO}_2$  reactions.



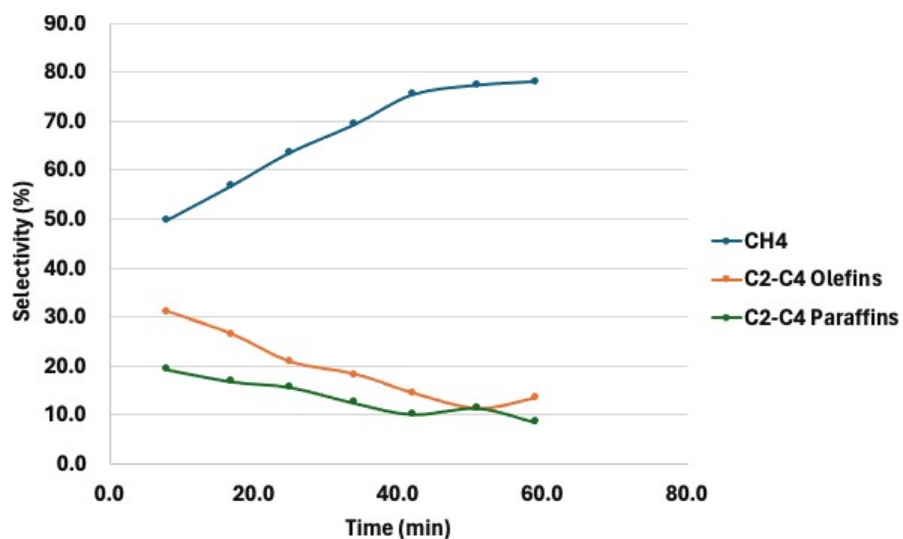

**Figure S7:** Hydrogenation of CO<sub>2</sub> captured in H<sub>2</sub>/CO pretreated Fe/KA (Table 2) at 320 °C. Amount of material: 2 g; Pretreatment conditions: H<sub>2</sub>/CO (2:1) = 60 mL/min, 400 °C, 3 h, followed by H<sub>2</sub> = 60 mL/min, 400 °C, 5 h; CO<sub>2</sub> capture conditions: CO<sub>2</sub> = 400 ppm in N<sub>2</sub> (flow rate = 1200 mL/min), H<sub>2</sub>O vapor = 0.5 mol%, 25 °C, 4 h; Hydrogenation: H<sub>2</sub> = 60 mL/min, 1.0 MPa, 320 °C for 2.5 h (5 °C/min). The selectivity of CO is <5% during the hydrogenation.

#### References:

- (1) C. Zhao, X. Chen, C. Zhao, *Energy Fuels* 2009, **23**, 4683-4687.
- (2) Y. Han, C. Fang, X. Ji, J. Wei, Q. Ge, J. Sun, *ACS Catal.* 2020, **10**, 12098-12108.
- (3) T. Numpilai, N. Chanlek, Y. Poo-Arporn, C. K. Cheng, N. Siri-Nguan, T. Sornchamni, M. Chareonpanich, P. Kongkachuichay, N. Yigit, G. Rupprechter, J. Limtrakul, T. Witoon *ChemCatChem* 2020, **12**, 3306-3320.
- (4) J. V. Veselovskaya, A. I. Lysikov, O. V. Netskina, D. V. Kuleshov, A. G. Okunev, *Ind. Eng. Chem. Res.* 2020, **59**, 7130-7139.
- (5) J. V. Veselovskaya, V. S. Derevschikov, T. Y. Kardash, O. A. Stonkus, T. A. Trubitsina, A. G. Okunev, *Int. J. Greenhouse Gas Control*, 2013, **17**, 332-340.
